# Supplementary material for: Age and Gender-related Variations of Molecular and Phenotypic Parameters in A Cohort of Sicilian Population: from Young to Centenarians
Source: PubMed Central journal article supplement (PMC8460304; doi:10.14336/ad.2021.0226), 2021-10-01
Supplement: AD-12-7-1773-s.pdf [file AD-12-7-1773-s.pdf]

# **Age and Gender-related Variations of Molecular and Phenotypic Parameters in A Cohort of Sicilian Population: from Young to Centenarians**

**Anna Aiello<sup>1,\*</sup>, Giulia Accardi<sup>1,\*</sup>, Stefano Aprile<sup>1,2</sup>, Rosalia Caldarella<sup>3</sup>, Ciriaco Carru<sup>4</sup>, Marcello Ciaccio<sup>3,5</sup>, Immacolata De Vivo<sup>6</sup>, Caterina Maria Gambino<sup>5</sup>, Mattia Emanuela Ligotti<sup>1</sup>, Sonya Vasto<sup>7</sup>, Angelo Zinellu<sup>4</sup>, Calogero Caruso<sup>8</sup>, Filippa Bono<sup>8\*</sup>, Giuseppina Candore<sup>1\*</sup>**

# SUPPLEMENTARY DATA

**Project: DESIGN**

**Questionnaire**

**Sample code:**

**Name of interviewer:**

# SUPPLEMENTARY DATA

## Anagraphic data

Date of visit \_\_\_\_\_

Surname \_\_\_\_\_

Name \_\_\_\_\_

Sex  M  F

Place of birth \_\_\_\_\_

Date of birth \_\_\_\_\_

(n° of ID) \_\_\_\_\_

Home address \_\_\_\_\_

Second address \_\_\_\_\_

Phone \_\_\_\_\_

Are your parents alive? YES NO Mother Father

Parents age (if alive) \_\_\_\_\_

**NOTE** specify the date and the cause of death of parents, uncles, brothers and sisters

\_\_\_\_\_  
 \_\_\_\_\_  
 \_\_\_\_\_  
 \_\_\_\_\_  
 \_\_\_\_\_

**NOTE** specify how many people are in your immediate family, if they are alive or not and which was the cause of death (eventually and for old and centenarians only).

\_\_\_\_\_  
 \_\_\_\_\_  
 \_\_\_\_\_  
 \_\_\_\_\_  
 \_\_\_\_\_

Name, surname, phone and address of your family doctor:

\_\_\_\_\_  
 \_\_\_\_\_

[se 4-9]

**Do you have a live-in caretaker? (only for old and centenarians)**

- 1. Spouse
- 2. Brothers/sisters
- 3. Sons/Daughters
- 4. Other parents
- 5. Friends
- 6. Nursing home
- 7. Caretaker

**Do you live in a:**

- 1. Home
- 2. Nursing home
- 3. Other

**Tax status:**

- 1. Single
- 2. Married
- 3. Widow/er
- 4. Divorced

**Education**

- Never go to school (self-educated)
- Primary school (not finished)
- Primary school
- Middle school
- High school
- Bachelor/Master's degree
- PhD
- Speciality (post-lauream)
- Illiterate

**Job (actual A and past P)**

- Manager
- Employed (sedentary. Es. office work)
- Employed (active. Es. postoffice)
- Farmer, manual labor
- Self-employed
- Housewife
- Other (specify).....

**Personal income (pre e post retirement)**

PRE  POST

# SUPPLEMENTARY DATA

Very low  
Low  
Good  
High  
Very high

|  |  |
|--|--|
|  |  |
|  |  |
|  |  |
|  |  |
|  |  |

Place of interview \_\_\_\_\_

# SUPPLEMENTARY DATA

## Cognitive and functional state (Only for LLIs)

### Mini mental state examination (MMSE)

(1=YES; 0=NO)

| Mini-Mental State Examination                                                                                                                 |  |
|-----------------------------------------------------------------------------------------------------------------------------------------------|--|
| What is the year? (0-1)                                                                                                                       |  |
| What is the season? (0-1)                                                                                                                     |  |
| What is the month? (0-1)                                                                                                                      |  |
| What date is today? (0-1)                                                                                                                     |  |
| What is the day (of the week) is? (0-1)                                                                                                       |  |
| Which nation is? (0-1)                                                                                                                        |  |
| What region is? (0-1)                                                                                                                         |  |
| What city is? (0-1)                                                                                                                           |  |
| Where are we? (0-1)                                                                                                                           |  |
| What floor is? (0-1)                                                                                                                          |  |
| Please, repeat: "Home, bread, cat" (0-3)                                                                                                      |  |
| I would like you to count backward from 100 by sevens (93-86-79-72-65).<br>Alternative: "Spell WORLD (D-L-R-O-W) (0-5)                        |  |
| Earlier I told you the names of three things. Can you tell me what those were (0-3)                                                           |  |
| Show the patient two simple objects, such as a wristwatch and a pencil, and ask the patient to name them (0-2)                                |  |
| Repeat the phrase: "Tiger against tiger" (0-1)                                                                                                |  |
| "Take the paper in your right hand, fold it in half, and put it on the floor." (The examiner gives the patient a piece of blank paper.) (0-3) |  |
| Please read this and do what it says." (Written instruction is "Close your eyes." (0-1)                                                       |  |
| <b>"Make up and write a sentence about anything." (This sentence must contain a noun and a verb.) (0-1)</b>                                   |  |
| <hr/>                                                                                                                                         |  |
| <hr/>                                                                                                                                         |  |

|                                |                                                                                    |  |
|--------------------------------|------------------------------------------------------------------------------------|--|
| Please copy this picture (0-1) | 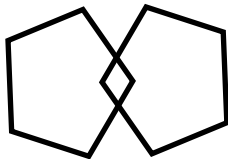 |  |
| Tot score MMSE                 |                                                                                    |  |
| Not applicable                 |                                                                                    |  |

## SUPPLEMENTARY DATA

|                                                                                                                     | Yes | No |
|---------------------------------------------------------------------------------------------------------------------|-----|----|
| Are you able to feed yourself?                                                                                      |     |    |
| Are able to leave your bed by yourself?                                                                             |     |    |
| Are you able to dress by yourself?                                                                                  |     |    |
| Are you able to use the toilette by yourself?                                                                       |     |    |
| Are you able to take a shower or a bath by yourself?                                                                |     |    |
| Are you able to control over bodily functions? (if no, please indicate since when you use catheter or adult diaper) |     |    |

**Activity of daily living (ADL) (Only for LLIs)**

### Instrumental activity of daily living (IADL) (Only for LLIs)

|                                               | Yes | No |
|-----------------------------------------------|-----|----|
| Do you usually cook your meals by yourself?   |     |    |
| Do you usually do regular housekeeping?       |     |    |
| Do you usually use means of transportation?   |     |    |
| Do you usually go shopping?                   |     |    |
| Do you usually do laundry?                    |     |    |
| Do you usually use the phone?                 |     |    |
| Do you usually take medicine alone?           |     |    |
| Do you usually manage your financial matters? |     |    |

# SUPPLEMENTARY DATA

## Nutrition

Have you lost your appetite in the last year?

YES  No

Have you eaten less in the last three months?

1. High reduction of food consumption

2. Moderate reduction of food consumption

3. No reduction of food consumption

Are you eating a well-balanced diet?

1. High malnutrition

2. Moderate malnutrition or do not know

3. No nutritional problem

Have you lost weight in the last 2/5 years?

Yes  No

If yes, how many kilos? \_\_\_\_\_

4. Do you have teeth? Yes  No

## Smoke and alcohol

**Never smoked**

**Prevoius smoker** (n° of cigarettes)

How many years did you regularly smoke?

**Smoker** (n° of cigarettes)

Have you ever quit smoking?

If yes, for how long?

Do you drink alcohol (es. hard liquor or wine or beer)?

If yes, how many glasses a week?

What kind of alcoholic beverages do you drink?

Wine? (Please, indicate if red:R or white:W (B in italian)

Beer?

Hard liquor?

## Sleep

At what time do you go to bed? \_\_\_\_\_

How many hours do you sleep? \_\_\_\_\_

Do you get up during the night?  Yes  No

Are you satisfy by your sleep?  Yes  No

Do you do nap during the day?  Yes  No

Yes  No

Do you take some medicines to sleep?

Do you remember your dreams?  Yes  No

Do you have trouble falling asleep?  Yes  No

Do you snore?  Yes  No

Have you ever had insomnia?  Yes  No  
If yes, when (at what age)? \_\_\_\_\_

## Religion

**Are you religious?**

1. Yes, I go to the church or I pray everyday

2. Yes, I watch church services on TV on Sunday

3. I'm believer but no practicing

4. I'm not believer

## Health and morbidity

**How you define your health status:**

1. Excellent

2. Very good

3. Good

4. Bad

5. Very bad

Have you fallen down in the last year? YES NO

If yes, how many times \_\_\_\_\_

Have you were in the hospital in the last year? YES NO

YES NO

If yes, how many times \_\_\_\_\_

Have you got fractures in the last year? YES NO

If yes, in which part of your body \_\_\_\_\_

Have you bedsores or skin ulcer? YES NO

## Diseases

**Cardiovascular (past/present)**

Yes  No

# SUPPLEMENTARY DATA

1. Hypertension
2. Ischemic heart disease
3. Supra-aortic trunks aterosclerosis
4. Pulmonary embolism
5. Atrial fibrillation
6. Deep vein thrombosis
7. Orthostatic hypotension
8. Peripheral arterial disease
9. Claudicatio
10. Heart failure

|  |  |
|--|--|
|  |  |
|  |  |
|  |  |
|  |  |
|  |  |
|  |  |
|  |  |
|  |  |
|  |  |
|  |  |

## Neurological (past/present)

1. Stroke
2. Ictus
3. Hemiparesis/Hemiplegia
4. Tetraplegia
5. Parkinson's disease
6. Epilepsy

|  |  |
|--|--|
|  |  |
|  |  |
|  |  |
|  |  |
|  |  |
|  |  |

## Gastrointestinal (past/present)

1. Gastritis
2. Ulcer
3. Dyspepsia
4. Constipation
5. Diarrhoea
6. IBD
7. Diverticulosis/diverticulitis
8. Colon poliposis

| Yes | No |
|-----|----|
|     |    |
|     |    |
|     |    |
|     |    |
|     |    |
|     |    |
|     |    |
|     |    |

## Endocrine (past/present)

1. Type II Diabetes
2. Hypothyroidism
3. Hyperthyroidism

|  |  |
|--|--|
|  |  |
|  |  |
|  |  |

## Musculoskeletal (past/present)

1. Artrosis
2. Osteoporosis

|  |  |
|--|--|
|  |  |
|  |  |

## Pulmunar (past/present)

1. Asthma
2. Enphysema
3. Chronic obstructive pulmonary disease

|  |  |
|--|--|
|  |  |
|  |  |
|  |  |

## Sense (past/present)

1. Glaucoma
2. Deafness
3. Macular degeneration
4. Cataract

|  |  |
|--|--|
|  |  |
|  |  |
|  |  |
|  |  |

## Genitourinary (past/present)

1. Urinar tract infection
2. Dialysis
3. Prostatic Hypertrofy
4. Kidney failure

|  |  |
|--|--|
|  |  |
|  |  |
|  |  |
|  |  |

## Infectious (past/present)

1. Fever
2. Infection

|  |  |
|--|--|
|  |  |
|  |  |

## Cancer (past/present)

1. Non metastatic tumor
2. Metastatic tumor

|  |  |
|--|--|
|  |  |
|  |  |



# SUPPLEMENTARY DATA

## Medicines

Please, indicate the following information:

Commercial name

Dose

Per day (D)/per week (W)

Over the counter (OTC)

Occasional consumption (OC)

| Name  | Dose  | D/W   | OTC   | OC    |                          |
|-------|-------|-------|-------|-------|--------------------------|
| ..... | ..... | ..... | ..... | ..... | <input type="checkbox"/> |
| ..... | ..... | ..... | ..... | ..... | <input type="checkbox"/> |
| ..... | ..... | ..... | ..... | ..... | <input type="checkbox"/> |
| ..... | ..... | ..... | ..... | ..... | <input type="checkbox"/> |
| ..... | ..... | ..... | ..... | ..... | <input type="checkbox"/> |
| ..... | ..... | ..... | ..... | ..... | <input type="checkbox"/> |
| ..... | ..... | ..... | ..... | ..... | <input type="checkbox"/> |
| ..... | ..... | ..... | ..... | ..... | <input type="checkbox"/> |
| ..... | ..... | ..... | ..... | ..... | <input type="checkbox"/> |
| ..... | ..... | ..... | ..... | ..... | <input type="checkbox"/> |
| ..... | ..... | ..... | ..... | ..... | <input type="checkbox"/> |
| ..... | ..... | ..... | ..... | ..... | <input type="checkbox"/> |
| ..... | ..... | ..... | ..... | ..... | <input type="checkbox"/> |
| ..... | ..... | ..... | ..... | ..... | <input type="checkbox"/> |
| ..... | ..... | ..... | ..... | ..... | <input type="checkbox"/> |
| ..... | ..... | ..... | ..... | ..... | <input type="checkbox"/> |
| ..... | ..... | ..... | ..... | ..... | <input type="checkbox"/> |
| ..... | ..... | ..... | ..... | ..... | <input type="checkbox"/> |
| ..... | ..... | ..... | ..... | ..... | <input type="checkbox"/> |
| ..... | ..... | ..... | ..... | ..... | <input type="checkbox"/> |
| ..... | ..... | ..... | ..... | ..... | <input type="checkbox"/> |

Verify the consume of laxatives.

# SUPPLEMENTARY DATA

## GERIATRIC DEPRESSION SCALE (Only for LLIs)

Choose the best answer for how you have felt over the past week:

1. Are you basically satisfied with your life? YES / NO
2. Have you dropped many of your activities and interests? YES / NO
3. Do you feel that your life is empty? YES / NO
4. Do you often get bored? YES / NO
5. Are you in good spirits most of the time? YES / NO
6. Are you afraid that something bad is going to happen to you? YES / NO
7. Do you feel happy most of the time? YES / NO
8. Do you often feel helpless? YES / NO
9. Do you prefer to stay at home, rather than going out and doing new things? YES / NO
10. Do you feel you have more problems with memory than most people? YES / NO
11. Do you think it is wonderful to be alive now? YES / NO
12. Do you feel pretty worthless the way you are now? YES / NO
13. Do you feel full of energy? YES / NO
14. Do you feel that your situation is hopeless? YES / NO
15. Do you think that most people are better off than you are? YES / NO

One point for "No" to questions 1, 5, 7, 11, 13

One point for "Yes" to the other questions

A score > 5 points is suggestive of depression.

A score  $\geq$  10 points is almost always indicative of depression.

# SUPPLEMENTARY DATA

**-For men:**

Do you remember your weight at 30 years?  
(if yes, please indicate it)

\_\_\_\_\_

**-For women:**

Age at menarche: \_\_\_\_\_  
Age at menopause: \_\_\_\_\_  
N° of pregnancies/abortion: \_\_\_\_\_  
Last pregnancy (age): \_\_\_\_\_  
Weight pre-pregnancy?

\_\_\_\_\_

## Physical function (code 7-9)

**How far is your home to your office?**

Less than 5 Km   
Between 5 Km and 15 Km   
More than 15 Km   
Other \_\_\_\_\_

**How do you go at work?**

Foot   
Bicycle   
Motorbike or scooter   
Car   
Public transportation (bus, metro, train)   
Other (specify).....)

**If you choose public transportation (bus, train, metro) to go to work, how far is the stop from your house?**

Less 100 metres   
From 100 to 500 metres   
More than 500 metres

**Do you practice physical activity regularly?**

Yes   
No

**If yes, what kind of activity do you practice? (it is possible more than one answer)**

Running   
Walking   
Soccer   
Fitness   
Swimming   
Bicycle   
Other (specify)

**If you practice physical activity, how many days a week?**

Everyday   
Some days (please indicate .....)  
Only the week-end

**If you practice physical activity, how much time?**

Less than 1 hour   
1 hour   
2 hours   
more than 2 hours

**Considering your daily working activities, how much time do you walk in a day?**

Less than 30 minutes   
From 30 to 60 minutes   
More than 60 minutes

**Balance**

|                                                                                      |                          |
|--------------------------------------------------------------------------------------|--------------------------|
| 0. It can't stay stand with your feet together for 10 seconds                        | <input type="checkbox"/> |
| 1. It can stand with your feet together for 10 seconds but not hips width apart      | <input type="checkbox"/> |
| 2. It can stand with your hips width apart for 10 seconds but not with feet together | <input type="checkbox"/> |
| 3. It can stand with feet together for more than 2 second but less than 10 seconds   | <input type="checkbox"/> |
| 4. It can stay in tandem for more than 10                                            | <input type="checkbox"/> |
| <b>Score</b>                                                                         | <input type="checkbox"/> |

# SUPPLEMENTARY DATA

# SUPPLEMENTARY DATA

## FOOD FREQUENCY QUESTIONNAIRE

### Food Habits

(Don't fill out the meals that usually the subject doesn't consume)

A. Which meals do you usually consume in one day? And where?

|                 | Home | Cafeteria/Office | Fast-food Chains | Pizzeria/Restaurant | Other |
|-----------------|------|------------------|------------------|---------------------|-------|
| Breakfast       |      |                  |                  |                     |       |
| Morning snack   |      |                  |                  |                     |       |
| Lunch           |      |                  |                  |                     |       |
| Afternoon snack |      |                  |                  |                     |       |
| Dinner          |      |                  |                  |                     |       |

B. If you eat for breakfast, what do you usually eat? (more answers allowed)

Coffee  Brioche  Milk  Cookies  Cappuccino   
 Cereal  Tea  Italian dry bread  Fruit juice   
 Bread  Yogurt  Other \_\_\_\_\_

C. If you eat for lunch, what do you usually eat? (more answers allowed)

First serving  Second serving  A side of vegetables  Bread  Fruits  Dessert  Coffee  
 Other \_\_\_\_\_

D. If you eat for dinner, what do you usually eat? (more answers allowed)

First serving  Second serving  A side of vegetables  Bread  Fruits  Dessert  Coffee  
 Other \_\_\_\_\_

E. During the morning snack, what do you usually eat? (more answers allowed)

The  Coffee  Fruit juice  Fresh Fruits  Dry Fruits  Cookies  Yogurt  
 Other \_\_\_\_\_

F. During the afternoon snack, what do you usually eat? (more answers allowed)

# SUPPLEMENTARY DATA

The Coffee Fruit juice Fresh Fruits Dry Fruits Cookies Yogurt

Other \_\_\_\_\_

I. How much water do you drink in one day (Please refer to the last year)?

≤ 0,5 L     0,5 L < x < 1 L     1 L < x < 1,5 L     1,5 L < x < 2 L     > 2 L

L. How frequently do you consume sweetened beverages (fruit juices, tea, carbonated beverages)?

A glass a day     More than 3 glasses a day     2-3 times a week

Once a month     Rarely     Never

M. How frequently do you consume alcoholic beverages?

A glass a day     More than 3 glasses a day     2-3 times a week

Once a month     Rarely     Never

N. Do you add sugar to beverages?    Yes    No    If yes, how? \_\_\_\_\_

O. How frequently do you use this kind of cooking methods?

|                          | Two times in one day (lunch and dinner) | One time in a day (lunch or dinner) | Two-Three times in one week | One time in a week | One time in a month | Less than one time in a month | Never |
|--------------------------|-----------------------------------------|-------------------------------------|-----------------------------|--------------------|---------------------|-------------------------------|-------|
| Boiled                   |                                         |                                     |                             |                    |                     |                               |       |
| Steam                    |                                         |                                     |                             |                    |                     |                               |       |
| Stew (cook on low heat)  |                                         |                                     |                             |                    |                     |                               |       |
| Oven                     |                                         |                                     |                             |                    |                     |                               |       |
| Stir-fry                 |                                         |                                     |                             |                    |                     |                               |       |
| Fried                    |                                         |                                     |                             |                    |                     |                               |       |
| Roasted (pan or grilled) |                                         |                                     |                             |                    |                     |                               |       |
| Grilled                  |                                         |                                     |                             |                    |                     |                               |       |

P. Do you follow a diet? (Es. vegetarian, etc.)     Yes     No    If Yes, which one? \_\_\_\_\_

Q. Are you celiac?     Yes     No

R. Do you have food allergies?     Yes     No    If Yes, which one? \_\_\_\_\_

S. Do you use dietary supplements?    Yes    No

# SUPPLEMENTARY DATA

T. If Yes, how often?

Occasionally

Regularly

U. If Yes, which one? (More answers allowed)

Vitamins

Minerals

Probiotics

Proteins/aminoacids

Dietary fibers

Antioxidants

## Historic frequency of consumption for food groups (only for LLIs)

During the childhood (from the birth to 15 years old) you usually ate

|                                                 | Two times in one day (lunch and dinner) | One time in a day (lunch or dinner) | Two-Three times in one week | One time in a week | One time in a month | Less than one time in a month | Never |
|-------------------------------------------------|-----------------------------------------|-------------------------------------|-----------------------------|--------------------|---------------------|-------------------------------|-------|
| Milk, cheese, yogurt                            |                                         |                                     |                             |                    |                     |                               |       |
| Legumes (please specify)                        |                                         |                                     |                             |                    |                     |                               |       |
| Pasta or Bread (please specify which one)       |                                         |                                     |                             |                    |                     |                               |       |
| Meat (please specify which one)                 |                                         |                                     |                             |                    |                     |                               |       |
| Eggs                                            |                                         |                                     |                             |                    |                     |                               |       |
| Seafood                                         |                                         |                                     |                             |                    |                     |                               |       |
| Fruits or vegetables (please specify which one) |                                         |                                     |                             |                    |                     |                               |       |
| Dessert                                         |                                         |                                     |                             |                    |                     |                               |       |

## Frequency of consumption for food groups IN THE LAST MONTH

|                                           | Two times in one day (lunch and dinner) | One time in a day (lunch or dinner) | Two-Three times in one week | One time in a week | One time in a month | Less than one time in a month | Never |
|-------------------------------------------|-----------------------------------------|-------------------------------------|-----------------------------|--------------------|---------------------|-------------------------------|-------|
| <b>Cereals and Derivatives and Tubers</b> |                                         |                                     |                             |                    |                     |                               |       |
| Pasta                                     |                                         |                                     |                             |                    |                     |                               |       |
| Rice                                      |                                         |                                     |                             |                    |                     |                               |       |
| Bread                                     |                                         |                                     |                             |                    |                     |                               |       |
| Pizza                                     |                                         |                                     |                             |                    |                     |                               |       |
| Spelt                                     |                                         |                                     |                             |                    |                     |                               |       |
| Barley                                    |                                         |                                     |                             |                    |                     |                               |       |
| Potatos                                   |                                         |                                     |                             |                    |                     |                               |       |
| Other (specify)                           |                                         |                                     |                             |                    |                     |                               |       |

# SUPPLEMENTARY DATA

|                           |  |  |  |  |  |  |  |
|---------------------------|--|--|--|--|--|--|--|
|                           |  |  |  |  |  |  |  |
| <b>Cereal-Based Foods</b> |  |  |  |  |  |  |  |
| Breakfast cereals         |  |  |  |  |  |  |  |
| Italian dry bread         |  |  |  |  |  |  |  |
| Cracker                   |  |  |  |  |  |  |  |
| Other (specify)           |  |  |  |  |  |  |  |

|                                                    | Two times in one day (lunch and dinner) | One time in a day (lunch or dinner) | Two-Three times in one week | One time in a week | One time in a month | Less than one time in a month | Never |
|----------------------------------------------------|-----------------------------------------|-------------------------------------|-----------------------------|--------------------|---------------------|-------------------------------|-------|
| <b>White Meat</b>                                  |                                         |                                     |                             |                    |                     |                               |       |
| Chicken                                            |                                         |                                     |                             |                    |                     |                               |       |
| Turkey                                             |                                         |                                     |                             |                    |                     |                               |       |
| Rabbit                                             |                                         |                                     |                             |                    |                     |                               |       |
| Lamb                                               |                                         |                                     |                             |                    |                     |                               |       |
| <b>Red Meat</b>                                    |                                         |                                     |                             |                    |                     |                               |       |
| Veal                                               |                                         |                                     |                             |                    |                     |                               |       |
| Beef                                               |                                         |                                     |                             |                    |                     |                               |       |
| Pork                                               |                                         |                                     |                             |                    |                     |                               |       |
| <b>Processed Meat</b>                              |                                         |                                     |                             |                    |                     |                               |       |
| Ham, etc.                                          |                                         |                                     |                             |                    |                     |                               |       |
| Salami, wurstel                                    |                                         |                                     |                             |                    |                     |                               |       |
| Canned meat                                        |                                         |                                     |                             |                    |                     |                               |       |
| <b>Eggs</b>                                        |                                         |                                     |                             |                    |                     |                               |       |
| Eggs from chicken                                  |                                         |                                     |                             |                    |                     |                               |       |
| Other                                              |                                         |                                     |                             |                    |                     |                               |       |
| <b>Seafood</b>                                     |                                         |                                     |                             |                    |                     |                               |       |
| Bluefish (gilthead bream, mackerel, anchovy, etc)* |                                         |                                     |                             |                    |                     |                               |       |
| Crustaceans                                        |                                         |                                     |                             |                    |                     |                               |       |
| Shellfish                                          |                                         |                                     |                             |                    |                     |                               |       |
| Canned seafood (tuna/ mackerel, smoked salmon)     |                                         |                                     |                             |                    |                     |                               |       |
| *F=Fresh; S=Frozen                                 |                                         |                                     |                             |                    |                     |                               |       |
| <b>Legumes</b>                                     |                                         |                                     |                             |                    |                     |                               |       |
| Dry Legumes                                        |                                         |                                     |                             |                    |                     |                               |       |
| Fresh Legumes                                      |                                         |                                     |                             |                    |                     |                               |       |
| Canned Legumes                                     |                                         |                                     |                             |                    |                     |                               |       |
| Frozen Legumes                                     |                                         |                                     |                             |                    |                     |                               |       |



# SUPPLEMENTARY DATA

| Dressing                          |  |  |  |  |  |  |  |
|-----------------------------------|--|--|--|--|--|--|--|
| Extra Virgin Olive oil            |  |  |  |  |  |  |  |
| Lemon                             |  |  |  |  |  |  |  |
| Vinegar                           |  |  |  |  |  |  |  |
| Salt                              |  |  |  |  |  |  |  |
| Spices                            |  |  |  |  |  |  |  |
| Aromatic Herbs                    |  |  |  |  |  |  |  |
| Animal Fats (butter, lard, cream) |  |  |  |  |  |  |  |
| Margarina                         |  |  |  |  |  |  |  |
| Altro                             |  |  |  |  |  |  |  |

|                                        | One portion in a day (lunch or dinner) | Two portions in one day (lunch and dinner) | 2-3 portions in one week | 1 portion in one week | One time in a month | Less than one time in a month | Never |
|----------------------------------------|----------------------------------------|--------------------------------------------|--------------------------|-----------------------|---------------------|-------------------------------|-------|
| Milk and milk derivatives              |                                        |                                            |                          |                       |                     |                               |       |
| Cow's milk                             |                                        |                                            |                          |                       |                     |                               |       |
| Vegetable Milk (specify the kind)      |                                        |                                            |                          |                       |                     |                               |       |
| Yogurt from milk                       |                                        |                                            |                          |                       |                     |                               |       |
| Yogurt from soy milk                   |                                        |                                            |                          |                       |                     |                               |       |
| Others yogurt                          |                                        |                                            |                          |                       |                     |                               |       |
| Fresh Cheese                           |                                        |                                            |                          |                       |                     |                               |       |
| Aged cheese (Parmesan, pecorino, ecc.) |                                        |                                            |                          |                       |                     |                               |       |
| Sweeteners                             |                                        |                                            |                          |                       |                     |                               |       |
| Sugar                                  |                                        |                                            |                          |                       |                     |                               |       |
| Honey                                  |                                        |                                            |                          |                       |                     |                               |       |
| Sweetener (specify)                    |                                        |                                            |                          |                       |                     |                               |       |

## Desserts

|                 |  |  |  |  |  |  |  |
|-----------------|--|--|--|--|--|--|--|
| Cookies         |  |  |  |  |  |  |  |
| Bakery products |  |  |  |  |  |  |  |
| Gelato          |  |  |  |  |  |  |  |

## Fruits

|                       |  |  |  |  |  |  |  |
|-----------------------|--|--|--|--|--|--|--|
| Seasonal Fresh Fruits |  |  |  |  |  |  |  |
| Fresh fruits          |  |  |  |  |  |  |  |
| Exotic Fresh fruits   |  |  |  |  |  |  |  |

# SUPPLEMENTARY DATA

| Dry fruits                  |                                                |                                            |                                    |                           |                            |               |              |                          |
|-----------------------------|------------------------------------------------|--------------------------------------------|------------------------------------|---------------------------|----------------------------|---------------|--------------|--------------------------|
|                             | <b>Two times in one day (lunch and dinner)</b> | <b>One time in a day (lunch or dinner)</b> | <b>Two-Three times in one week</b> | <b>One time in a week</b> | <b>One time in a month</b> | <b>Rarely</b> | <b>Never</b> | <b>No in this season</b> |
| <b>Vegetables</b>           |                                                |                                            |                                    |                           |                            |               |              |                          |
| Tomato                      |                                                |                                            |                                    |                           |                            |               |              |                          |
| Pepper                      |                                                |                                            |                                    |                           |                            |               |              |                          |
| Beet                        |                                                |                                            |                                    |                           |                            |               |              |                          |
| Turnip                      |                                                |                                            |                                    |                           |                            |               |              |                          |
| Onions                      |                                                |                                            |                                    |                           |                            |               |              |                          |
| Cauliflower                 |                                                |                                            |                                    |                           |                            |               |              |                          |
| Fennel                      |                                                |                                            |                                    |                           |                            |               |              |                          |
| Mushroom                    |                                                |                                            |                                    |                           |                            |               |              |                          |
| Broccoli                    |                                                |                                            |                                    |                           |                            |               |              |                          |
| Zucchini                    |                                                |                                            |                                    |                           |                            |               |              |                          |
| Artichoke                   |                                                |                                            |                                    |                           |                            |               |              |                          |
| Pickle                      |                                                |                                            |                                    |                           |                            |               |              |                          |
| Eggplant                    |                                                |                                            |                                    |                           |                            |               |              |                          |
| Specify se di stagione o no |                                                |                                            |                                    |                           |                            |               |              |                          |
| Cabbage                     |                                                |                                            |                                    |                           |                            |               |              |                          |
| Radicchio                   |                                                |                                            |                                    |                           |                            |               |              |                          |
| Arugola                     |                                                |                                            |                                    |                           |                            |               |              |                          |
| Lattuce                     |                                                |                                            |                                    |                           |                            |               |              |                          |
| Spinach                     |                                                |                                            |                                    |                           |                            |               |              |                          |
